# Supplementary material for: Polyphenols Profile and Antioxidant Activity Characterization of Commercial North Italian Ciders in Relation to Their Geographical Area of Production and Cidermaking Procedures
Source: MDPI journal article supplement (doi:10.3390/beverages9020054), 2023-06-20
Supplement: s1 [file s1]

## Supplementary material

Statistical analysis. PLS regression predicts a set of dependent variables from a set of independent variables (predictors) by combining features from principal component analysis and multiple linear regression. The prediction is achieved by extracting a set of orthogonal factors from the predictors, called latent variables, and the goal of PLS is to find a series of uncorrelated latent variables such that the covariance between them and the set of dependent variables is maximal. PLS is particularly useful in situations where there are many possibly correlated predictor variables and relatively few samples, and, similarly to principal components analysis, it also allows to explore the data in search of hidden correlations and patterns.

The predictors were stored in a data matrix  $X$  and the independent variables in a data matrix  $Y$  of mean-centered and normalized column vectors. To identify the number of latent variables that allows the PLS regression model to provide an optimal prediction of new observations we used the leave-one-out cross-validation technique. This is a resampling method that separates the data into a training set and a test set, and it thus allows to test the prediction capabilities of the PLS model.

**Table S1.** List of the chemical reagent used.

| <b>Reagent</b>                                                  | <b>CAS number</b> | <b>Purity</b>                                    | <b>Company</b> |
|-----------------------------------------------------------------|-------------------|--------------------------------------------------|----------------|
| Methanol                                                        | 67-56-1           | suitable for HPLC, gradient grade, $\geq 99.9\%$ | Sigma-Aldrich  |
| Water                                                           | 7732-18-5         | suitable for HPLC, high purity                   | Sigma-Aldrich  |
| Trifluoroacetic acid                                            | 76-05-1           | suitable for HPLC, $\geq 99.0\%$                 | Sigma-Aldrich  |
| Chlorogenic acid                                                | 327-97-9          | primary reference standard                       | Sigma-Aldrich  |
| Folin & Ciocalteu's phenol reagent                              | not present       | undeclared                                       | Sigma-Aldrich  |
| Sodium carbonate                                                | 497-19-8          | ACS reagent, anhydrous, $\geq 99.5\%$            | Sigma-Aldrich  |
| 2,2'-diphenyl-1-picrylhydrazyl (DPPH)                           | 1898-66-4         | undeclared                                       | Sigma-Aldrich  |
| 6-hydroxy-2,5,7,8-tetramethylchroman-2-carboxylic acid (TROLOX) | 53101-49-8        | $\geq 98\%$                                      | Sigma-Aldrich  |
| Sodium acetate                                                  | 127-09-3          | anhydrous, ReagentPlus®, $\geq 99.0\%$           | Sigma-Aldrich  |
| 2,4,6-Tri(2-pyridyl)-s-triazine (TPTZ)                          | 3682-35-7         | for spectrophotometric det. (of Fe), $\geq 98\%$ | Sigma-Aldrich  |
| Iron(III) chloride hexahydrate                                  | 10025-77-1        | puriss. p.a., reag. Ph. Eur., $\geq 99\%$        | Sigma-Aldrich  |
| 2,2'-azino-bis(3-ethylbenzothiazoline-6-sulfonic acid (ABTS)    | 30931-67-0        | $\geq 98\%$ (HPLC)                               | Sigma-Aldrich  |
| Potassium persulfate                                            | 7727-21-1         | ACS reagent, $\geq 99.0\%$                       | Sigma-Aldrich  |
| Tyrosol                                                         | 501-94-0          | analytical standard, $\geq 99.5\%$               | Sigma-Aldrich  |
| (-)-Epicatechin                                                 | 490-46-0          | analytical standard, $\geq 97.0\%$ (HPLC)        | Sigma-Aldrich  |
| (+)-Catechin                                                    | 154-23-4          | analytical standard, $\geq 99.0\%$               | Sigma-Aldrich  |
| Procyanidin B1                                                  | 20315-25-7        | analytical standard, $\geq 90\%$ (HPLC)          | Sigma-Aldrich  |
| Procyanidin B2                                                  | 29106-49-8        | analytical standard, $\geq 90\%$ (HPLC)          | Sigma-Aldrich  |
| Phloridzin dihydrate                                            | 7061-54-3         | analytical standard, $\geq 98.5\%$ (HPLC)        | Sigma-Aldrich  |
| Quercetin-3-glucoside                                           | 482-35-9          | analytical standard, $\geq 98\%$ (HPLC)          | Sigma-Aldrich  |

**Table S2.** Gradient conditions for polyphenols separation by HPLC.

| <b>Minutes</b> | <b>% Solvent A <sup>a</sup></b> | <b>% Solvent B <sup>a</sup></b> |
|----------------|---------------------------------|---------------------------------|
| 0-2            | 95%                             | 5%                              |
| 2-7            | 88%                             | 12%                             |
| 7-38           | 45%                             | 55%                             |
| 38-39          | 0%                              | 100%                            |
| 39-40          | 0%                              | 100%                            |
| 40-41          | 95%                             | 5%                              |
| 41-45          | 95%                             | 5%                              |

<sup>a</sup> Solvent A: water; Solvent B: methanol.
